# Supplementary material
Source: PubMed Central journal article supplement (PMC9724657)
Supplement: EMBR-23-e55175-s001.pdf [file EMBR-23-e55175-s001.pdf]

Fig 2A

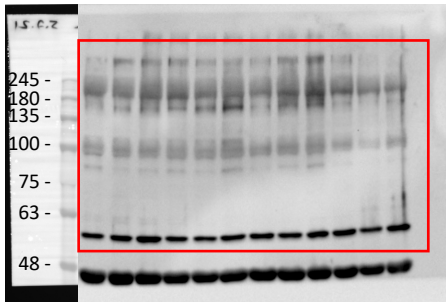

IB: Desmin

Brightness and contrast were increased

Fig 2B

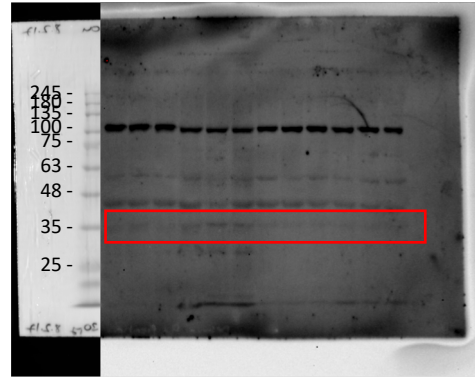

Desmin filaments  
IB: ATAD1

Brightness and contrast were increased

Fig 2C

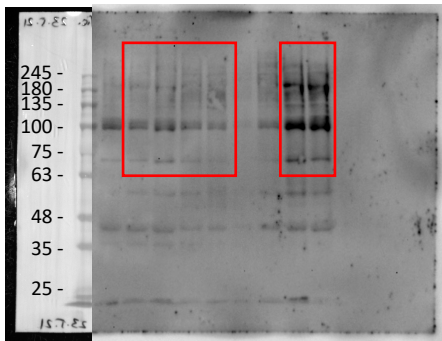

Desmin filaments  
IB: Ub

Brightness and contrast were increased

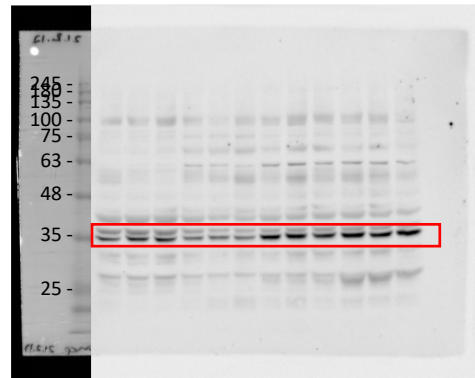

Soluble fraction  
IB: ATAD1

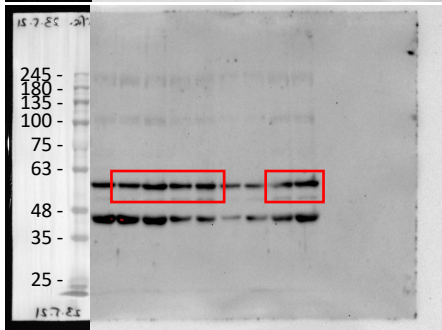

Desmin filaments  
IB: Desmin

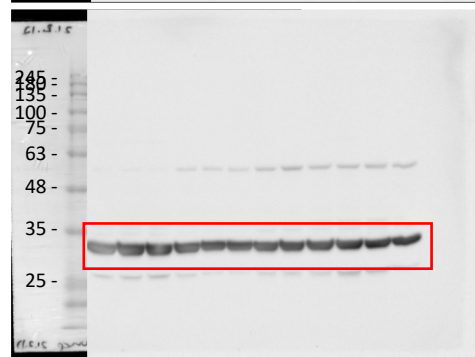

Soluble fraction  
IB: GAPDH

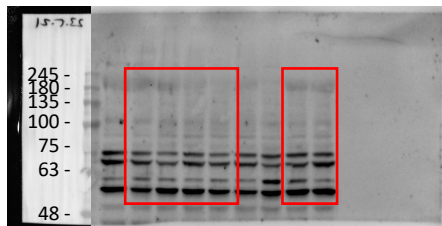

Soluble fraction  
IB: Desmin

Brightness and contrast were increased

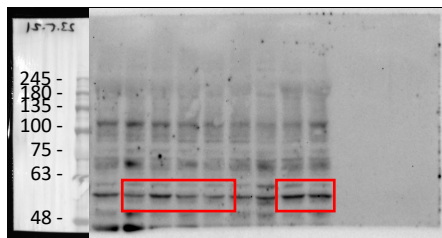

Soluble fraction  
IB: Desmin  
Short exposure

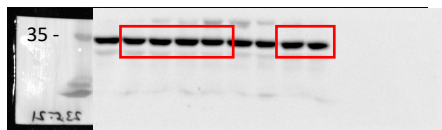

Soluble fraction  
IB: GAPDH

Fig 2D

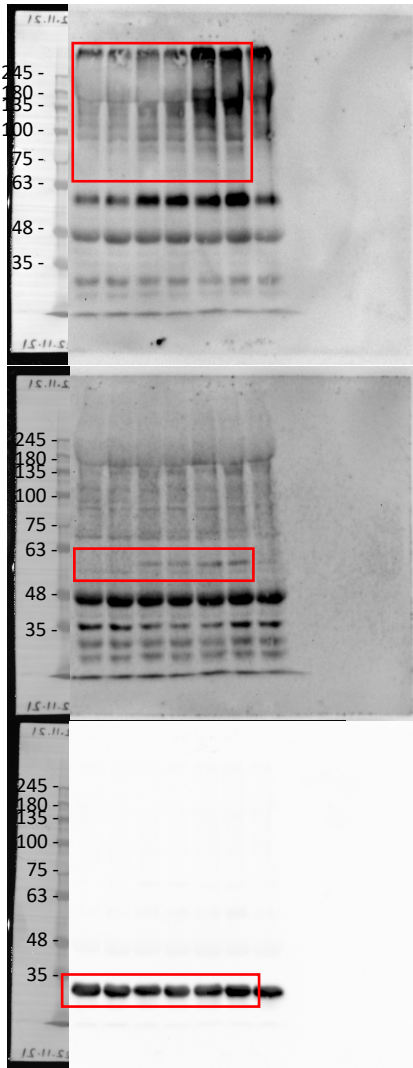

IB: Ub

Brightness and contrast were increased

IB: Desmin

Brightness and contrast were increased

IB: GAPDH

Fig 2E

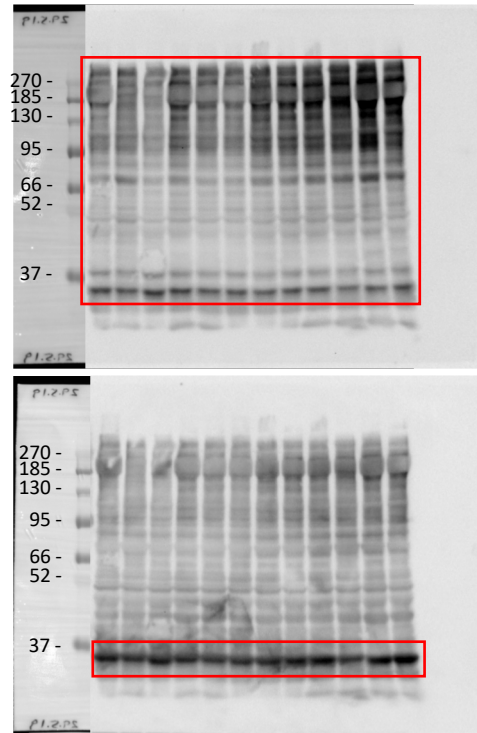

IB: Ub

Brightness and contrast were increased

IB: GAPDH

Brightness and contrast were increased

Fig 2F

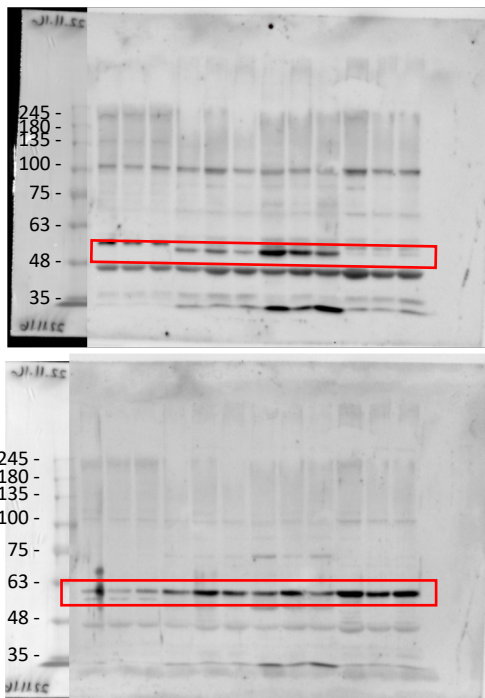

Insoluble fraction  
IB: pSER

Insoluble fraction  
IB: Desmin

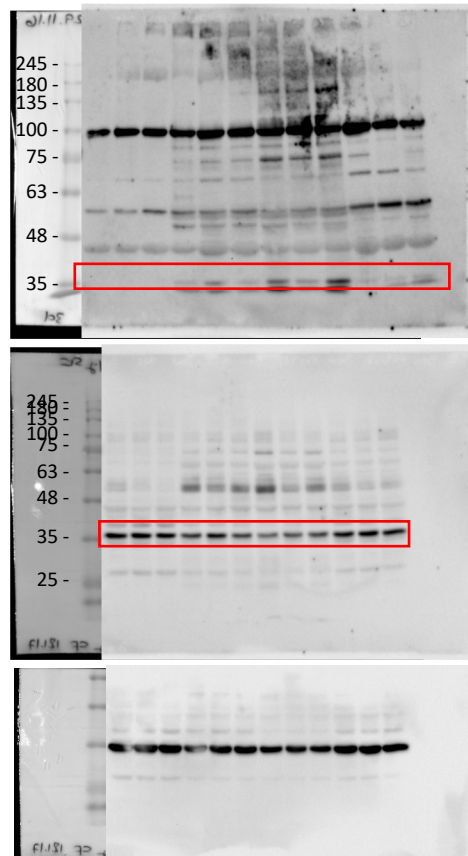

Desmin filaments  
IB: ATAD1

Soluble fraction  
IB: ATAD1

Soluble fraction  
IB: GAPDH
