# Supplementary material
Source: PubMed Central journal article supplement (PMC9724657)
Supplement: EMBR-23-e55175-s004.pdf [file EMBR-23-e55175-s004.pdf]

Fig 4B

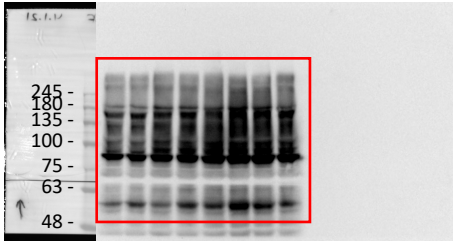

Soluble  
Fraction  
IB: Ub

Brightness  
and contrast  
were  
increased

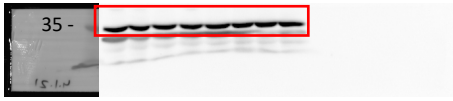

Soluble  
Fraction  
IB: GAPDH

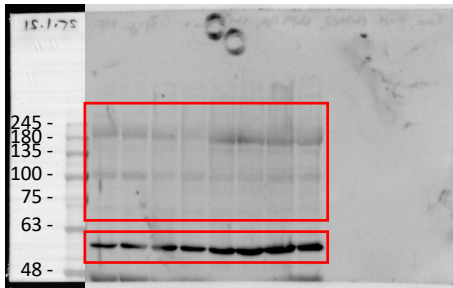

Insoluble  
Fraction  
IB: Desmin

Brightness  
and contrast  
were  
increased

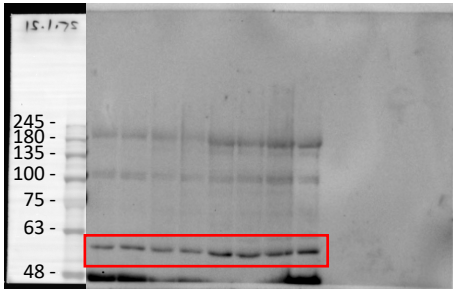

Insoluble  
Fraction  
IB: pSER

Brightness  
and contrast  
were  
increased
