# Supplementary material
Source: PubMed Central journal article supplement (PMC9724657)
Supplement: EMBR-23-e55175-s005.pdf [file EMBR-23-e55175-s005.pdf]

Fig 5A

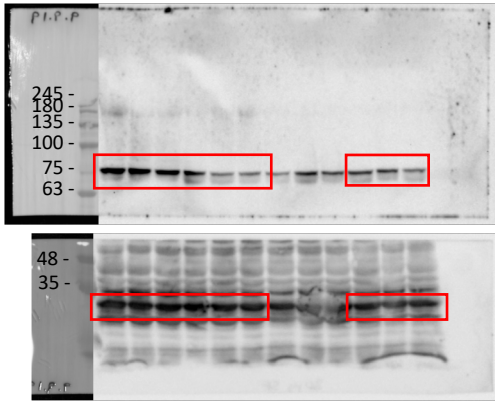

IB: Calpain-1

Brightness and contrast were increased

IB: GAPDH

Brightness and contrast were increased

Fig 5C

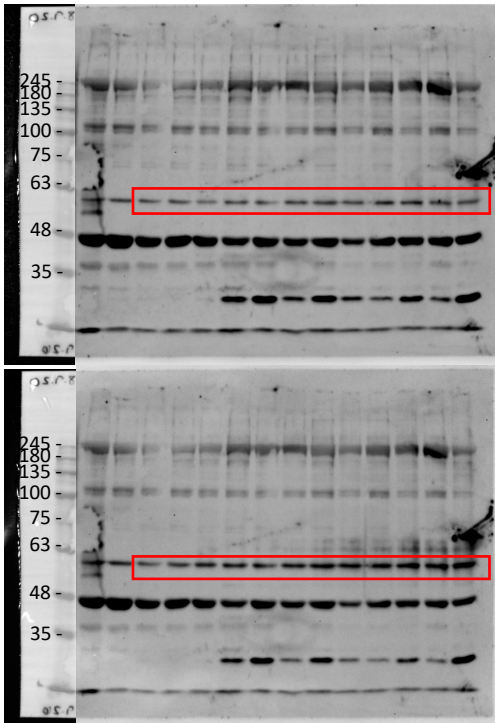

IB: pSER

Brightness and contrast were increased

IB: Desmin

Brightness and contrast were increased

Fig 5D

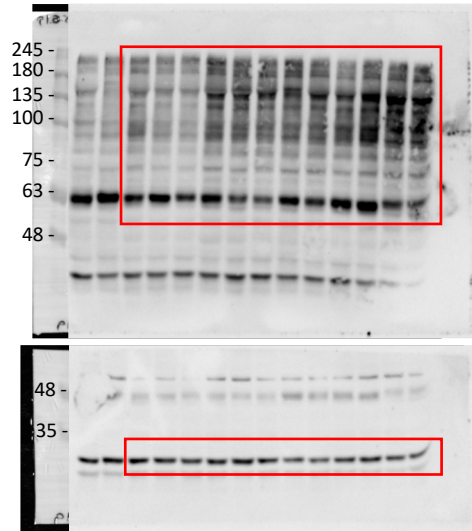

IB: Ub

Brightness and contrast were increased

IB: GAPDH

Brightness and contrast were increased

Fig 5E

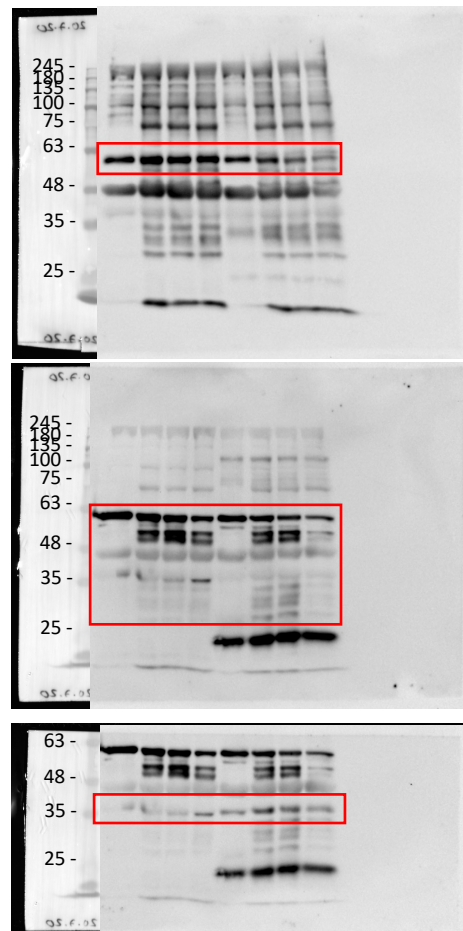

IB: pSER

IB: Desmin

IB: ATAD1

Fig 5G

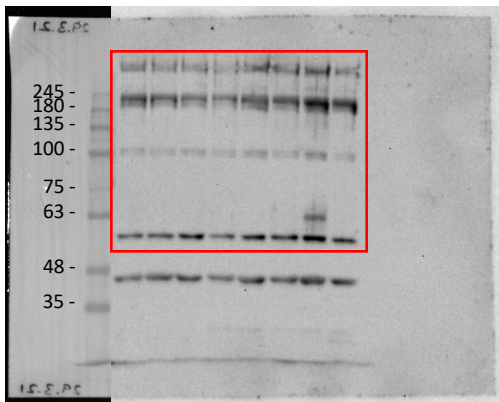

IB: Desmin

Brightness and contrast were increased

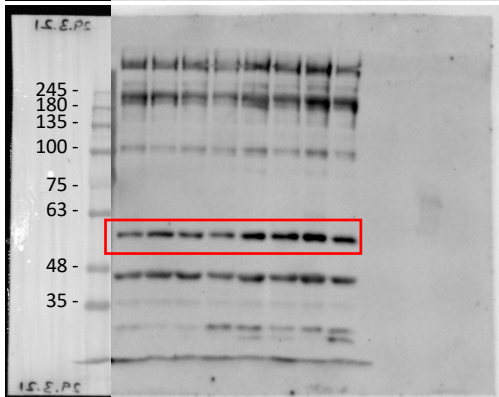

IB: pSER

Brightness and contrast were increased

Fig 5H

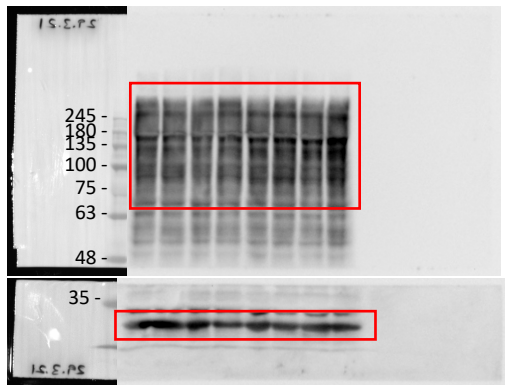

IB: Desmin

Brightness and contrast were increased

IB: GAPDH
