# Supplementary material
Source: PubMed Central journal article supplement (PMC9724657)
Supplement: EMBR-23-e55175-s007.pdf [file EMBR-23-e55175-s007.pdf]

**Appendix** for “The AAA-ATPase ATAD1 and its partners promote degradation of desmin intermediate filaments in muscle”

| <b>Page number</b> | <b>Appendix Figure/Table</b> | <b>Legend</b>                                                                                                                 |
|--------------------|------------------------------|-------------------------------------------------------------------------------------------------------------------------------|
| Page 2             | Appendix Figure S1           | Downregulation of ATAD1 in 14 d denervated muscles.                                                                           |
| Page 2             | Appendix Figure S2           | Downregulation of ATAD1 in normal muscles.                                                                                    |
| Page 3             | Appendix Figure S3           | Calpain-1 is not required for ATAD1 recruitment to desmin filaments, but rather to ATAD1 release when desmin IF depolymerize. |
| Page 3             | Appendix Figure S4           | ATAD1 is expressed in various tissues.                                                                                        |
| Page 4             | Appendix Table S1            | Quantitative PCR primers and shRNA oligonucleotides used in the present study                                                 |

**Appendix figures:**

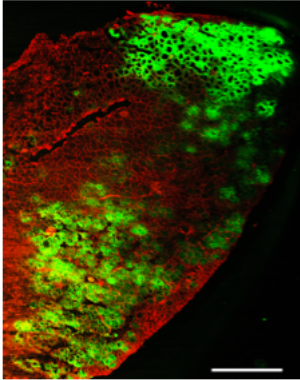

**Appendix Figure S1:** Cross sections from 14 d denervated muscles expressing shAtad1 were stained with WGA, and fiber size was measured using the Metamorph software. A representative image is shown. Bar, 500  $\mu\text{m}$ .

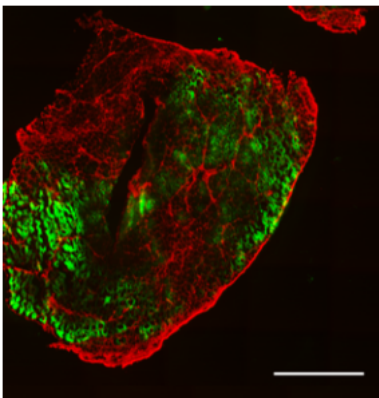

**Appendix Figure S2:** Cross sections from normal muscles expressing shAtad1 were stained with WGA, and fiber size was measured using the Metamorph software. A representative image is shown. Bar, 1000  $\mu\text{m}$ .

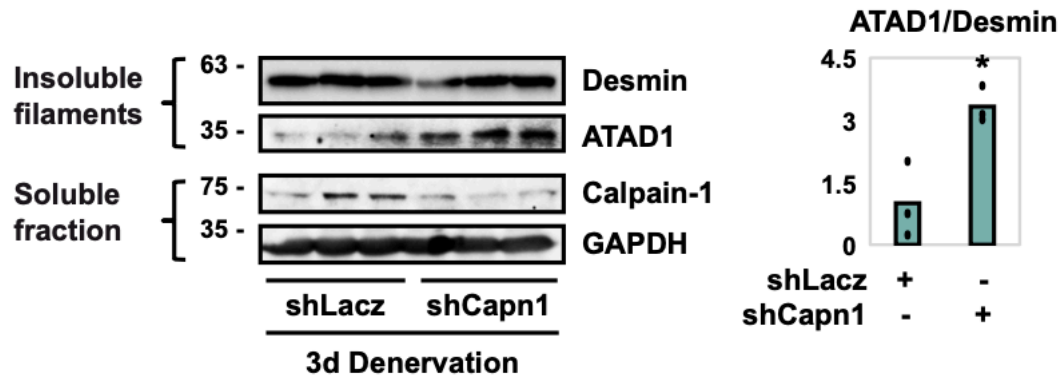

**Appendix Figure S3: Calpain-1 is not required for ATAD1 recruitment to desmin filaments, but rather to ATAD1 release when desmin IF depolymerize.** Left: desmin filaments isolated from denervated muscles expressing shLacZ or shCapn1 were analyzed by immunoblotting. Right: densitometric measurement of presented blots. Mean ratio of ATAD1 to desmin  $\pm$  SEM is presented. n = 3 mice, biological replicates. \*, P < 0.04 vs. shLacZ.

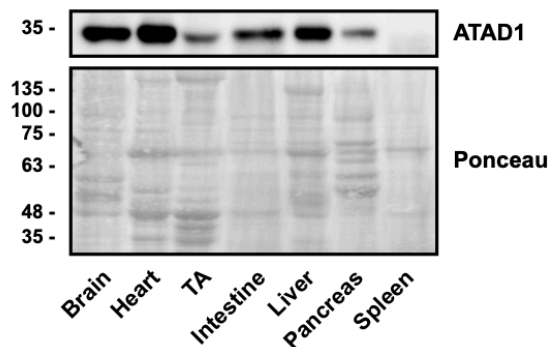

**Appendix Figure S4: ATAD1 is expressed in various tissues.** Soluble fractions from brain, heart, TA muscle, intestine, liver, pancreas and spleen were analyzed by SDS-PAGE and immunoblotting.

**Appendix Table S1. Quantitative PCR primers and shRNA oligonucleotides used in the present study**

| DNA                | Gene         | Sequence (5' to 3')       |
|--------------------|--------------|---------------------------|
| PCR primer forward | <i>ATAD1</i> | TCTCCCATCGTCTCTGGTCCT     |
| PCR primer reverse | <i>ATAD1</i> | TTCTACCTTCTGCTTCCTGGTG    |
| PCR primer forward | <i>PLAA</i>  | ACTGGATCAGCAGACAAGACC     |
| PCR primer reverse | <i>PLAA</i>  | CCAGTGATCTGCCACCTTCTA     |
| PCR primer forward | <i>UBXN4</i> | GAGCCACATCCACAGAGCCTT     |
| PCR primer reverse | <i>UBXN4</i> | CGCTACCCTACATCTGCTGCGTGGA |
| PCR primer forward | <i>RPLPO</i> | GCGACCTGGAAGTCCAATA       |
| PCR primer reverse | <i>RPLPO</i> | ATCTGCTTGGAGCCCACAT       |
| shRNA-1            | <i>ATAD1</i> | CCTCCTCTGTGTCAGGGAATA     |
| shRNA-2            | <i>ATAD1</i> | AGGAAACTGAGTGCAGCCTGA     |
| shRNA              | <i>UBXN4</i> | GTGGTGGCGCATGCCTTTAAT     |
| shRNA              | <i>PLAA</i>  | TGGCGAGTGTCTGGAAGTATA     |
