# Supplementary material
Source: PubMed Central journal article supplement (PMC9724657)

Fig 3B

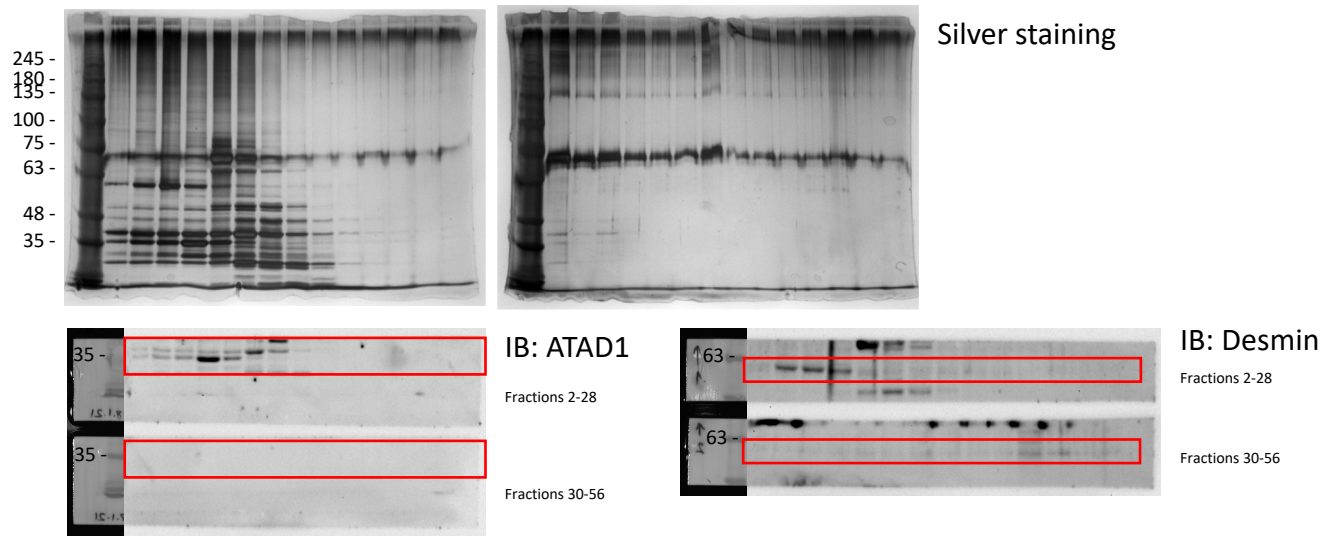

Fig 3D

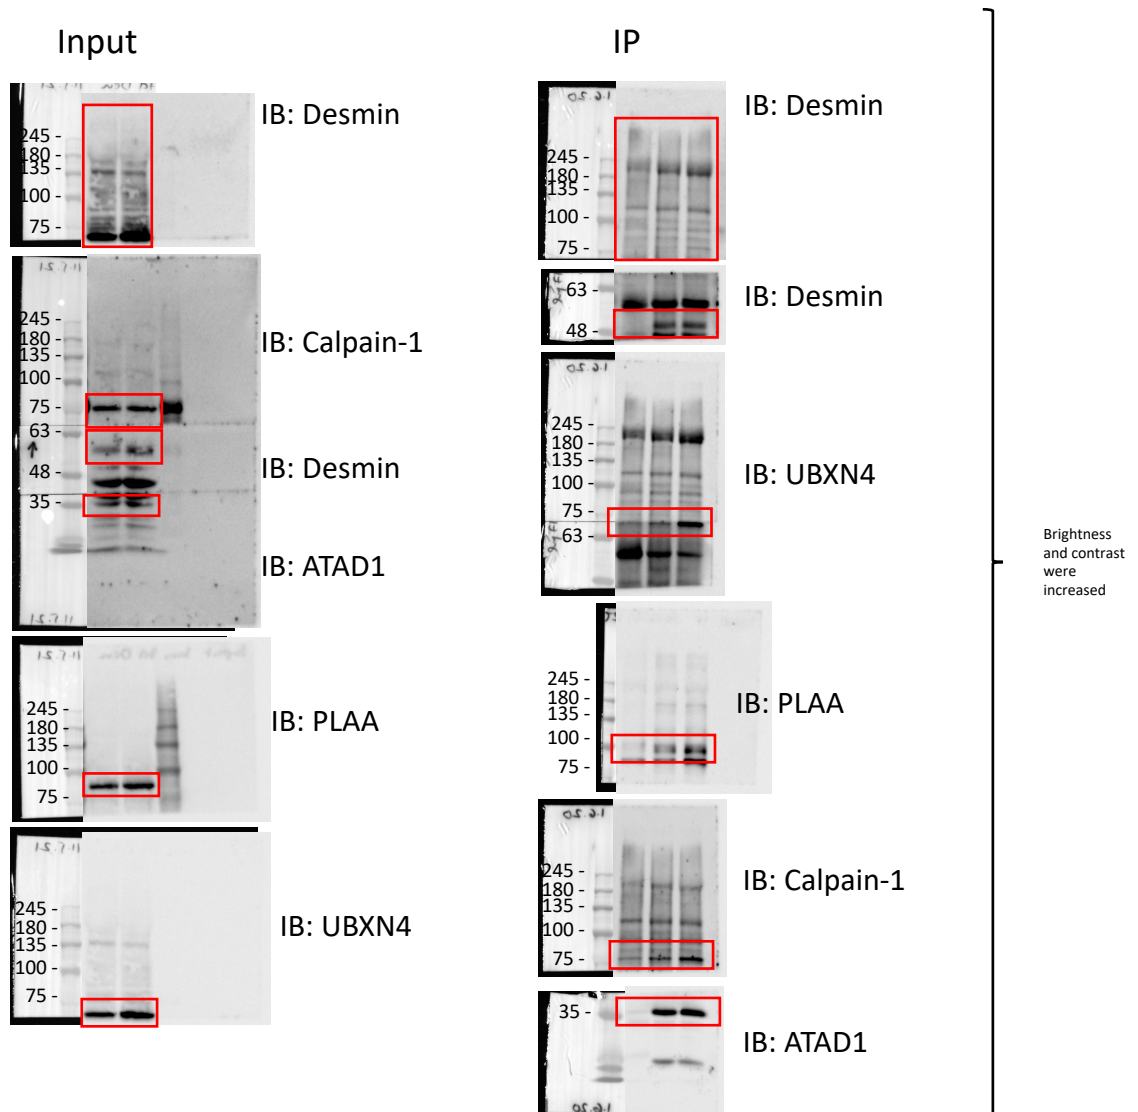

Fig 3E

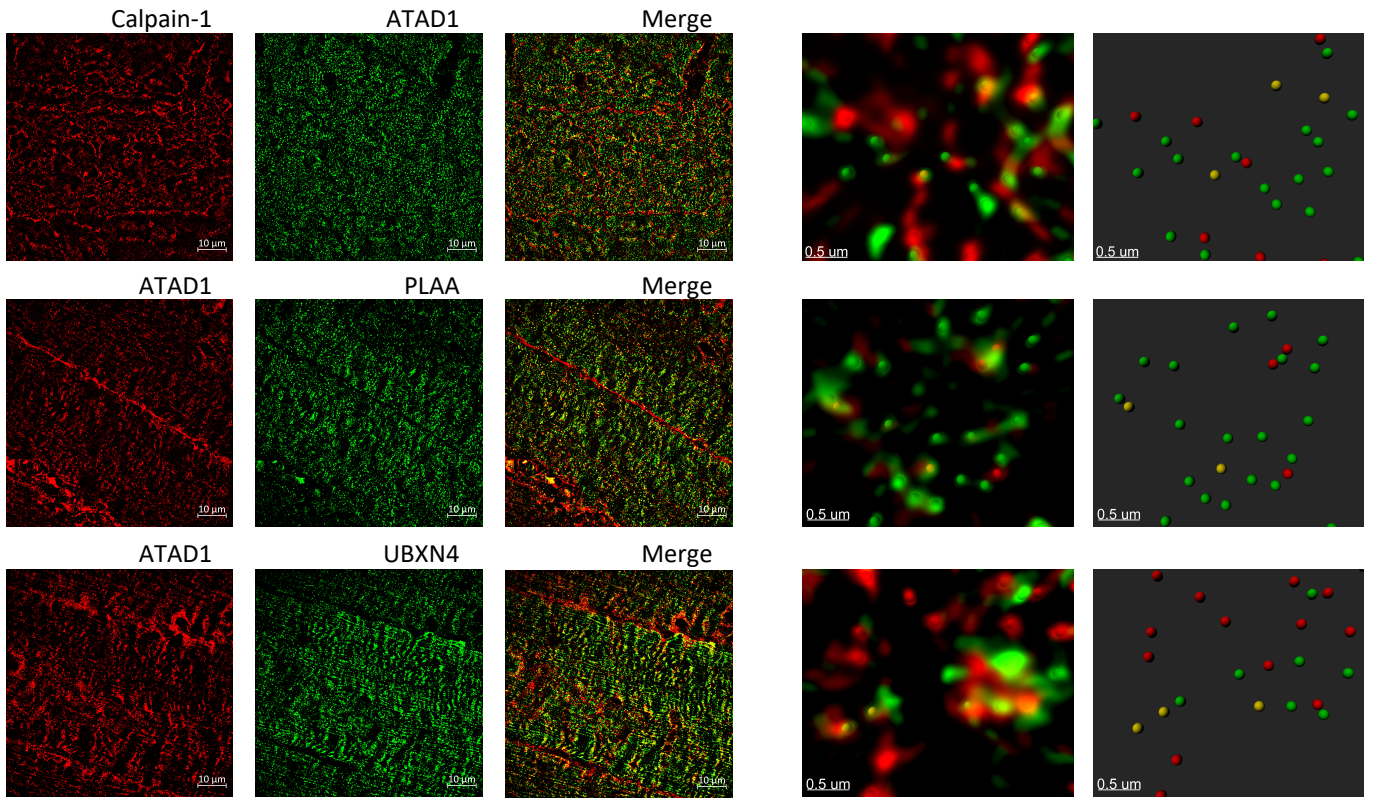

Supplement: EMBR-23-e55175-s003.pdf [file EMBR-23-e55175-s003.pdf]
